# Supplementary material for: Distinct Patterns of Myeloid Cell Infiltration in Patients With hrHPV-Positive and hrHPV-Negative Penile Squamous Cell Carcinoma: The Importance of Assessing Myeloid Cell Densities Within the Spatial Context of the Tumor
Source: Front Immunol. 2021 Jun 14;12:682030. doi: 10.3389/fimmu.2021.682030 (PMC8236714; doi:10.3389/fimmu.2021.682030)
Supplement: Supplementary file 1 [file Table_1.xlsx]

## Sheet: CD14
Supplementary Table 1. Association between compartment-specific myeloid cell densities and clinical parameters
Clinical parameters		Total			PT			IT			Stroma			Tumor			PT Stroma			PT Tumor			IT Stroma			IT Tumor
	N	Median	p-Value	N	Median	p-Value	N	Median	p-Value	N	Median	p-Value	N	Median	p-Value	N	Median	p-Value	N	Median	p-Value	N	Median	p-Value	N	Median	p-Value
HPV Status			0.029			0.250			<0.001			0.962			<0.001			0.978			0.004			0.567			<0.001
Negative	60	424.48		55	588.97		52	205.31		60	978.77		60	106.59		55	1178.78		55	163.62		46	745.93		52	80.22
Positive	42	525.62		37	675.76		38	408.78		42	1064.03		42	251.31		37	1145.21		37	242.96		35	696.08		38	248.43
Grade			0.393			0.214			0.262			0.507			0.001			0.364			0.001			0.624			<0.001
Well	33	448.36		33	525.49		29	203.77		33	944.68		33	98.03		33	1067.80		33	110.86		26	670.50		29	78.20
Intermediate	52	496.65		44	605.23		45	294.89		52	1064.03		52	176.23		44	1155.86		44	213.44		43	781.46		45	111.55
Poor	17	549.86		15	821.66		16	302.74		17	1196.05		17	234.15		15	133.27		15	283.62		12	733.44		16	231.76
Age	102	0.231	0.019	92	0.340	0.001	90	0.109	0.309	102	0.276	0.005	102	0.076	0.447	92	0.394	<0.001	92	0.017	0.871	81	0.179	0.111	90	0.078	0.466
Tumor size	102	0.020	0.846	92	0.124	0.240	90	0.131	0.219	102	0.187	0.060	102	-0.147	0.141	92	0.235	0.024	92	-0.104	0.322	81	0.318	0.004	90	-0.138	0.195
LN Status			0.963			0.718			0.220			0.722			0.765			0.611			0.539			0.716			0.835
Negative	67	501.82		60	610.51		59	303.73		67	992.03		67	171.61		60	1143.46		60	189.62		55	746.52		59	113.73
Positive	35	450.79		32	605.23		31	225.60		35	1112.57		35	167.85		32	1187.42		32	185.66		26	720.03		31	97.39
LVI			0.838			0.960			0.964			0.676			0.770			0.801			0.519			0.247
Negative	88	496.65		79	612.88		76	293.29		88	1069.29		88	171.40		79	1157.09		79	185.15		68	770.91		76	123.87	0.903
Positive	14	450.38		13	597.58		14	293.10		14	917.51		14	172.43		13	1154.63		13	200.16		13	617.63		14	94.68
pT-stage			0.864			0.806			0.909			0.186			0.978			0.240			0.808			0.482			0.746
pT1a-b	30	493.06		29	597.01		25	297.21		30	856.55		30	171.40		29	949.05		29	200.16		24	710.89		25	92.90
pT2	62	496.65		55	644.30		55	284.49		62	1137.67		62	172.64		55	1126.58		55	185.15		48	785.40		55	126.63
pT3-4	10	452.40		8	642.99		10	297.71		10	974.70		10	174.86		8	1075.73		8	280.05		9	613.07		10	102.91
PT, peritumoral; IT, intratumoral; hrHPV, high-risk human papilloma virus; LN, lymph node; LVI, lymphovascular invasion.
Bold numbers are statistically significant.

## Sheet: CD68
Supplementary Table 1. Association between compartment-specific myeloid cell densities and clinical parameters
Clinical parameters		Total			PT			IT			Stroma			Tumor			PT Stroma			PT Tumor			IT Stroma			IT Tumor
	N	Median	p-Value	N	Median	p-Value	N	Median	p-Value	N	Median	p-Value	N	Median	p-Value	N	Median	p-Value	N	Median	p-Value	N	Median	p-Value	N	Median	p-Value
HPV Status			0.049			0.316			0.003			0.230			<0.001			0.351			0.026			0.075			<0.001
Negative	51	153.34		53	228.03		48	83.49		57	377.17		57	58.36		53	406.94		53	94.19		42	283.63		48	42.41
Positive	41	202.95		35	246.34		37	146.28		41	260.32		41	125.99		35	298.69		35	129.80		34	175.72		37	119.89
Grade			0.239			0.507			0.095			0.728			<0.001			0.945			<0.001			0.280			<0.001
Well	30	126.61		29	209.07		26	74.65		30	334.90		30	32.04		29	393.44		29	48.34		23	195.50		26	20.53
Intermediate	50	189.92		42	234.61		42	134.27		50	304.99		50	103.97		42	365.31		42	128.65		40	352.86		42	75.35
Poor	18	186.70		17	265.50		17	119.89		18	305.58		18	134.25		17	345.51		17	192.38		13	137.32		17	92.49
Age	98	-0.064	0.529	88	-0.044	0.685	85	-0.007	0.948	98	-0.024	0.817	98	-0.079	0.438	88	0.001	0.994	88	-0.069	0.523	76	0.112	0.334	85	-0.072	0.510
Tumor size	98	-0.064	0.531	88	-0.011	0.919	85	0.067	0.540	98	0.002	0.983	98	-0.175	0.085	88	0.076	0.483	88	-0.071	0.509	76	0.176	0.129	85	-0.12	0.275
LN Status			0.189			0.103			0.882			0.096			0.070			0.060			0.025			0.841			0.194
Negative	64	161.91		57	224.04		56	115.62		64	277.80		64	78.31		57	315.72		57	84.61		52	239.04		56	52.47
Positive	34	197.63		31	265.50		29	106.95		34	450.57		34	108.39		31	487.38		31	139.76		24	230.79		29	74.31
LVI			0.499			0.202			0.678			0.338			0.749			0.229			0.568			0.649			0.510
Negative	85	183.87		76	238.82		72	108.34		85	314.73		85	97.71		76	399.70		76	108.69		64	250.87		72	63.17
Positive	13	139.83		12	184.22		13	129.89		13	254.26		13	92.25		12	227.78		12	127.22		12	216.05		13	68.78
pT-stage			0.257			0.280			0.210			0.355			0.224			0.386			0.209			0.263			0.275
pT1a-b	27	151.67		25	216.67		22	87.59		27	280.45		27	75.68		25	315.72		25	86.33		21	146.51		22	55.77
pT2	61	188.91		55	251.57		53	119.89		61	402.47		61	102.21		55	406.94		55	111.92		46	260.19		53	62.29
pT3-4	10	187.40		8	202.32		10	167.01		10	251.94		10	106.11		8	231.78		8	148.05		9	409.17		10	83.40
PT, peritumoral; IT, intratumoral; hrHPV, high-risk human papilloma virus; LN, lymph node; LVI, lymphovascular invasion.
Bold numbers are statistically significant.

## Sheet: CD163
Supplementary Table 1. Association between compartment-specific myeloid cell densities and clinical parameters
Clinical parameters		Total			PT			IT			Stroma			Tumor			PT Stroma			PT Tumor			IT Stroma			IT Tumor
	N	Median	p-Value	N	Median	p-Value	N	Median	p-Value	N	Median	p-Value	N	Median	p-Value	N	Median	p-Value	N	Median	p-Value	N	Median	p-Value	N	Median	p-Value
HPV Status			0.002			0.033			<0.001			0.133			<0.001			0.059			0.108			0.676			<0.001
Negative	58	422.97		52	578.85		51	185.41		58	110.39		58	98.00		52	1145.13		52	113.46		45	953.05		51	66.53
Positive	42	567.17		37	697.41		37	358.74		42	1224.75		42	163.46		37	1324.69		37	158.16		36	998.25		37	160.37
Grade			0.012			0.010			0.126			0.335			<0.001			0.285			<0.001			0.621			<0.001
Well	32	409.58		31	510.39		28	192.40		32	1063.16		32	72.45		31	1121.95		31	78.53		25	993.96		28	62.03
Intermediate	50	498.52		41	666.94		44	262.66		50	1159.76		50	121.91		41	1201.64		41	133.89		43	997.29		44	92.36
Poor	18	578.87		17	769.58		16	307.62		18	1276.90		18	220.19		17	1310.21		17	326.84		13	953.05		16	177.76
Age	100	0.160	0.113	89	0.285	0.007	88	-0.003	0.981	100	0.177	0.078	89	-0.068	0.503	89	0.251	0.018	89	-0.057	0.595	81	0.061	0.588	88	-0.075	0.489
Tumor size	100	-0.054	0.594	89	-0.046	0.671	88	0.241	0.024	100	0.022	0.828	89	-0.086	0.394	89	-0.033	0.759	89	-0.121	0.260	81	0.302	0.006	88	0.035	0.744
LN Status			0.775			0.596			0.449			0.871			0.202			0.980			0.060			0.762			0.666
Negative	65	487.09		57	649.43		58	280.41		65	1164.52		65	130.62		57	1212.24		57	114.44		55	993.96		58	94.80
Positive	35	490.41		32	649.69		30	224.72		35	1151.62		35	134.17		32	1142.58		32	152.57		26	952.19		30	92.36
LVI			0.984			0.981			0.964			0.518			0.190			0.737			0.133			0.046			0.523
Negative	86	487.18		77	639.32		74	254.06		86	1177.61		86	130.26		77	1220.23		77	130.96		68	1004.21		74	90.35
Positive	14	484.02		12	697.60		14	261.37		14	1057.79		14	194.54		12	1117.86		12	177.52		13	679.94		14	109.49
pT-stage			0.077			0.529			0.244			0.379			0.077			0.561			0.074			0.153			0.122
pT1a-b	29	442.98		28	563.05		24	193.60		29	1086.97		29	98.50		28	1106.89		28	102.07		23	829.50		24	62.26
pT2	61	508.16		54	691.17		54	272.48		61	1190.70		61	145.16		54	1242.04		54	145.61		49	1023.07		54	102.01
pT3-4	10	485.54		7	606.38		10	289.74		10	923.10		10	130.26		7	1063.88		7	97.49		9	874.98		10	106.53
PT, peritumoral; IT, intratumoral; hrHPV, high-risk human papilloma virus; LN, lymph node; LVI, lymphovascular invasion.
Bold numbers are statistically significant.
